# Supplementary material for: Density-dependent changes in the distribution of Southern Right Whales (Eubalaena australis) in the breeding ground Peninsula Valdés
Source: PeerJ. 2018 Dec 6;6:e5957. doi: 10.7717/peerj.5957 (PMC6286797; doi:10.7717/peerj.5957)
Supplement: Supplemental Information 1 [file peerj-06-5957-s001.xlsx]

## Sheet: Hoja1
segment	Density period 1			Density period 2			Density period 3			Density period 4
	Mother-calf pairs	Other groups	All groups	Mother-calf pairs	Other groups	All groups	Mother-calf pairs	Other groups	All groups	Mother-calf pairs	Other groups	All groups
1	0.0333333	0.0333333	0.0666667	0.0148148	0.0962963	0.111111	0.0313725	0.0705882	0.101961	0.0177778	0.115556	0.133333
2	0.0333333	0.1	0.133333	0.0148148	0.0666667	0.0814815	0.0470588	0.0392157	0.0862745	0.0444444	0.0622222	0.106667
3	0.0666667	0.0833333	0.15	0.0740741	0.125926	0.2	0.0156863	0.0470588	0.0627451	0.0177778	0.124444	0.142222
4	0.0333333	0.116667	0.15	0	0.0518519	0.0518519	0.0156863	0.0470588	0.0627451	0.0533333	0.142222	0.195556
5	0.0333333	0.0833333	0.116667	0.0148148	0.0888889	0.103704	0	0.054902	0.054902	0.0355556	0.106667	0.142222
6	0	0.0333333	0.0333333	0	0.148148	0.148148	0.0156863	0.0784314	0.0941176	0.0355556	0.115556	0.151111
7	0.0333333	0.0333333	0.0666667	0	0.0814815	0.0814815	0.0156863	0.0156863	0.0313725	0.0355556	0.0533333	0.0888889
8	0.0333333	0.05	0.0833333	0.0148148	0.0666667	0.0814815	0.0313725	0.0627451	0.0941176	0.0355556	0	0.0355556
9	0	0.0333333	0.0333333	0.0296296	0.0518519	0.0814815	0.0156863	0.0627451	0.0784314	0	0.00888889	0.00888889
10	0	0.05	0.05	0.0148148	0.0296296	0.0444444	0.0156863	0.0470588	0.0627451	0.0355556	0.0444444	0.08
11	0.0666667	0.0833333	0.15	0	0.0740741	0.0740741	0.0627451	0.0392157	0.101961	0.0355556	0.0266667	0.0622222
12	0.0333333	0.133333	0.166667	0.0444444	0.296296	0.340741	0.0470588	0.227451	0.27451	0.0888889	0.124444	0.213333
13	0.0333333	0.15	0.183333	0.0740741	0.562963	0.637037	0.141176	0.368627	0.509804	0.0177778	0.0355556	0.0533333
14	0	0.0333333	0.0333333	0.0296296	0.0962963	0.125926	0.0313725	0.054902	0.0862745	0	0.106667	0.106667
15	0	0	0	0	0.037037	0.037037	0	0.0392157	0.0392157	0	0	0
16	0	0.0166667	0.0166667	0	0.0444444	0.0444444	0	0	0	0	0	0
17	0	0	0	0	0.0296296	0.0296296	0.0313725	0.00784314	0.0392157	0.0177778	0.0177778	0.0355556
18	0	0	0	0	0.0888889	0.0888889	0.0156863	0.00784314	0.0235294	0.0177778	0.0622222	0.08
19	0	0.0166667	0.0166667	0.0148148	0.0814815	0.0962963	0.0156863	0.0627451	0.0784314	0.0355556	0.0533333	0.0888889
20	0	0.05	0.05	0.0296296	0.140741	0.17037	0.0156863	0.0313725	0.0470588	0.0177778	0.0533333	0.0711111
21	0.0333333	0.0166667	0.05	0.0148148	0.037037	0.0518519	0.0156863	0.0313725	0.0470588	0	0.106667	0.106667
22	0	0	0	0	0.0962963	0.0962963	0.0156863	0.0627451	0.0784314	0	0.0444444	0.0444444
23	0.0333333	0.0833333	0.116667	0.0148148	0.037037	0.0518519	0.0470588	0.0705882	0.117647	0.0177778	0.0355556	0.0533333
24	0.0333333	0.166667	0.2	0.0444444	0.140741	0.185185	0.0470588	0.0862745	0.133333	0.0711111	0.284444	0.355556
25	0.133333	0.133333	0.266667	0.148148	0.325926	0.474074	0.282353	0.227451	0.494118	0.133333	0.382222	0.515556
26	0.166667	0.583333	0.75	0.0888889	0.518519	0.607407	0.172549	0.619608	0.792157	0.177778	0.382222	0.56
27	0.416667	0.516667	0.933333	0.103704	0.466667	0.57037	0.376471	0.352941	0.729412	0.231111	0.337778	0.568889
28	0.833333	0.616667	1.45	0.474074	0.674074	1.14815	0.690196	0.643137	1.33333	1.15556	0.595556	1.75111
29	1.46667	1.68333	3.15	0.933333	1.01481	1.94815	1.06667	0.862745	1.90588	1.93778	0.915556	2.85333
30	0.933333	0.6	1.53333	0.666667	0.555556	1.22222	0.956863	0.792157	1.74902	1.42222	0.551111	1.97333
31	0.666667	0.683333	1.35	0.859259	0.748148	1.60741	0.831373	0.713725	1.5451	1.74222	0.506667	2.24889
32	0.433333	0.716667	1.15	0.518519	0.666667	1.18519	0.705882	0.588235	1.29412	0.853333	0.275556	1.12889
33	0.433333	0.366667	0.8	0.725926	0.644444	1.37037	0.486275	0.407843	0.894118	0.711111	0.32	1.03111
34	0.233333	0.4	0.633333	0.577778	0.474074	1.05185	0.392157	0.384314	0.776471	0.675556	0.471111	1.14667
35	0.2	0.283333	0.483333	0.785185	0.548148	1.33333	0.384314	0.439216	0.823529	1.06667	0.462222	1.52889
36	0.3	0.383333	0.683333	0.859259	0.303704	1.16296	0.8	0.611765	1.41176	1.15556	0.426667	1.58222
37	0.533333	0.433333	0.966667	1.21481	0.437037	1.65185	0.815686	0.470588	1.28627	0.604444	0.391111	0.995556
38	0.4	0.2	0.6	1.15556	0.607407	1.76296	0.666667	0.329412	0.996078	0.48	0.32	0.8
39	0.333333	0.183333	0.516667	1.00741	0.474074	1.48148	0.705882	0.376471	1.08235	0.462222	0.542222	0.995556
40	0.5	0.4	0.9	1.02222	0.666667	1.68889	0.690196	0.517647	1.20784	0.72	0.382222	1.10222
41	0.3	0.133333	0.433333	1.06667	0.392593	1.45926	0.862745	0.658824	1.52157	0.977778	0.435556	1.41333
42	0.0666667	0.15	0.216667	0.533333	0.577778	1.11111	0.580392	0.439216	1.01961	1.27111	0.195556	1.45778
43	0.133333	0.283333	0.416667	0.459259	0.37037	0.82963	0.627451	0.360784	0.988235	0.497778	0.24	0.737778
44	0.166667	0.216667	0.383333	0.385185	0.422222	0.807407	0.572549	0.486275	1.05882	0.551111	0.0711111	0.622222
45	0.233333	0.183333	0.416667	0.77037	0.237037	1.00741	0.329412	0.235294	0.564706	0.604444	0.311111	0.915556
46	0.2	0.1	0.3	0.444444	0.362963	0.807407	0.345098	0.211765	0.556863	0.391111	0.195556	0.586667
47	0.133333	0.0333333	0.166667	0.0148148	0.214815	0.22963	0.282353	0.266667	0.54902	0.142222	0.168889	0.311111
48	0.133333	0.0833333	0.216667	0.0592593	0.451852	0.511111	0.141176	0.188235	0.329412	0.213333	0.293333	0.506667
49	0.166667	0.5	0.666667	0.103704	0.437037	0.540741	0.376471	0.337255	0.713725	0.124444	0.133333	0.257778
50	0.0333333	0.1	0.133333	0.148148	0.133333	0.281481	0.0627451	0.117647	0.180392	0.0533333	0.0533333	0.106667
51	0	0.0833333	0.0833333	0.0444444	0.125926	0.17037	0.172549	0.12549	0.298039	0	0.0266667	0.0266667
52	0	0	0	0.0148148	0.0888889	0.103704	0.0627451	0.0235294	0.0862745	0	0.0266667	0.0266667
53	0.166667	0.0166667	0.183333	0.0296296	0.0666667	0.0962963	0.0470588	0.054902	0.101961	0	0.00888889	0.00888889
54	0.0333333	0.0166667	0.05	0.0296296	0.0518519	0.0814815	0.0313725	0.0313725	0.0627451	0.0355556	0.0711111	0.106667
55	0.0333333	0	0.0333333	0.0296296	0.0740741	0.103704	0.0156863	0.0235294	0.0392157	0.0355556	0.0177778	0.0533333
56	0	0.05	0.05	0.0296296	0.0518519	0.0814815	0.0156863	0.0784314	0.0941176	0	0.0533333	0.0533333
57	0	0	0	0	0.0296296	0.0296296	0.0156863	0.0156863	0.0313725	0.0177778	0.0444444	0.0622222
58	0.0333333	0.0166667	0.05	0.0148148	0.0592593	0.0740741	0.0627451	0.0156863	0.0784314	0.0355556	0.142222	0.177778
59	0.0666667	0.0166667	0.0833333	0.0148148	0.0222222	0.037037	0	0.0470588	0.0470588	0.0177778	0.08	0.0977778
60	0	0.0666667	0.0666667	0	0.0296296	0.0296296	0.0156863	0.0235294	0.0392157	0	0.00888889	0.00888889
61	0	0	0	0.0148148	0.037037	0.0518519	0.0627451	0.00784314	0.0705882	0	0.0355556	0.0355556
62	0	0.0166667	0.0166667	0	0.00740741	0.00740741	0.0313725	0.00784314	0.0392157	0	0.0355556	0.0355556
63	0	0	0	0	0.0222222	0.0222222	0.0313725	0.0470588	0.0784314	0	0.0444444	0.0444444
64	0	0	0	0.0296296	0.0148148	0.0444444	0	0.00784314	0.00784314	0	0.0177778	0.0177778
65	0.0333333	0.0166667	0.05	0	0.0148148	0.0148148	0	0.054902	0.0392157	0	0.0266667	0.0266667
66	0	0.05	0.05	0	0.0222222	0.0222222	0.0313725	0.054902	0.0862745	0.0177778	0.0355556	0.0533333
67	0	0	0	0	0.00740741	0.00740741	0.0156863	0.054902	0.0705882	0	0	0
68	0.0333333	0.0166667	0.05	0.0296296	0.0444444	0.0740741	0.0313725	0.054902	0.0862745	0.0355556	0.00888889	0.0444444
69	0	0.0333333	0.0333333	0.0296296	0.037037	0.0666667	0.0156863	0	0.0156863	0	0.0177778	0.0177778
70	0	0.0166667	0.0166667	0	0.0444444	0.0444444	0.0156863	0.0235294	0.0392157	0	0.08	0.08
71	0.0666667	0.0166667	0.0833333	0	0.0814815	0.0814815	0.0470588	0.0941176	0.141176	0	0	0
72	0	0.0333333	0.0333333	0.0148148	0.037037	0.0518519	0.0313725	0.133333	0.164706	0.0177778	0.0355556	0.0533333
73	0	0	0	0.0296296	0.0222222	0.0518519	0.0313725	0.0941176	0.12549	0.0177778	0.124444	0.142222
74	0	0.0333333	0.0333333	0	0.0814815	0.0814815	0.0156863	0.0313725	0.0470588	0.0177778	0.0888889	0.106667
75	0	0	0	0	0.0740741	0.0740741	0	0.00784314	0.00784314	0.0177778	0.0977778	0.115556
76	0	0	0	0	0.0222222	0.0222222	0.0156863	0	0.0156863	0	0.0266667	0.0266667
77	0	0	0	0	0.0296296	0.0296296	0.0627451	0.0627451	0.12549	0.0177778	0.0266667	0.0444444
78	0	0.05	0.05	0.0148148	0.0592593	0.0740741	0.0470588	0.0470588	0.0941176	0.0177778	0	0.0177778
79	0	0.0166667	0.0166667	0	0.00740741	0.00740741	0	0	0	0.0177778	0.0177778	0.0355556
80	0	0	0	0.0148148	0.00740741	0.0222222	0	0.00784314	0.00784314	0.0177778	0.0266667	0.0444444
81	0	0	0	0.0296296	0.0222222	0.0518519	0.0470588	0.0235294	0.0705882	0.0177778	0.00888889	0.0266667
82	0	0	0	0.0148148	0.111111	0.125926	0.0156863	0.00784314	0.0235294	0	0.0177778	0.0177778
83	0	0.05	0.05	0	0.0222222	0.0222222	0	0.054902	0.054902	0.0177778	0.00888889	0.0266667
84	0	0	0	0.0296296	0.037037	0.0666667	0.0156863	0.0392157	0.054902	0	0.0177778	0.0177778
85	0.0333333	0.0333333	0.0666667	0.0148148	0.037037	0.0518519	0.0627451	0.101961	0.164706	0.0177778	0.0177778	0.0355556
86	0	0.0166667	0.0166667	0	0.0666667	0.0666667	0	0.00784314	0.00784314	0	0.00888889	0.00888889
87	0.1	0.0333333	0.133333	0.0592593	0.0740741	0.133333	0.12549	0.054902	0.180392	0.0533333	0.0266667	0.08
88	0	0.0166667	0.0166667	0	0.0222222	0.0222222	0.0313725	0.0156863	0.0470588	0.0355556	0.0266667	0.0622222
89	0.0333333	0.0333333	0.0666667	0.0148148	0.0814815	0.0962963	0.0313725	0.0156863	0.0470588	0	0.0266667	0.0266667
90	0	0.0166667	0.0166667	0.0148148	0.103704	0.118519	0.0313725	0.0156863	0.0470588	0.0177778	0.0444444	0.0622222
91	0	0.0166667	0.0166667	0.0888889	0.0962963	0.185185	0.109804	0.0627451	0.172549	0.0711111	0.0177778	0.0888889
92	0.133333	0.05	0.183333	0.274074	0.207407	0.481481	0.611765	0.133333	0.745098	0.142222	0.106667	0.248889
93	0.166667	0.166667	0.333333	0.607407	0.444444	1.05185	1.11373	0.392157	1.50588	0.515556	0.177778	0.693333
94	0.266667	0.233333	0.5	1.00741	0.355556	1.36296	0.815686	0.305882	1.12157	0.96	0.204444	1.16444
95	0.366667	0.283333	0.65	0.97037	0.607407	1.57778	0.878431	0.376471	1.2549	1.06667	0.248889	1.31556
96	0.3	0.233333	0.533333	0.696296	0.325926	1.02222	0.705882	0.447059	1.15294	0.995556	0.168889	1.16444
97	0.866667	0.733333	1.6	0.844444	0.607407	1.45185	0.8	0.501961	1.30196	1.03111	0.373333	1.40444
98	0.8	1.01667	1.81667	1.65926	1.17778	2.83704	1.44314	0.909804	2.35294	1.56444	0.275556	1.84
99	0.533333	0.55	1.08333	1.02222	0.733333	1.75556	1.62353	0.760784	2.36863	0.8	0.613333	1.41333
100	0.5	0.233333	0.733333	0.962963	0.703704	1.66667	0.956863	0.768627	1.72549	0.8	0.337778	1.13778
101	0.333333	0.3	0.633333	0.37037	0.392593	0.762963	0.956863	0.698039	1.6549	0.284444	0.177778	0.453333
102	0.133333	0.05	0.183333	0.192593	0.140741	0.333333	0.392157	0.415686	0.807843	0.106667	0.133333	0.24
103	0.0666667	0.166667	0.233333	0.118519	0.185185	0.303704	0.188235	0.235294	0.423529	0.248889	0.115556	0.364444
104	0	0	0	0.207407	0.111111	0.318519	0.0941176	0.141176	0.235294	0.0533333	0.0622222	0.115556
105	0.0666667	0	0.0666667	0.0888889	0.0740741	0.162963	0.109804	0.0784314	0.188235	0.373333	0.0888889	0.462222
106	0.0333333	0	0.0333333	0	0.0888889	0.0888889	0.0627451	0.0470588	0.109804	0.177778	0.0444444	0.222222
107	0	0	0	0.133333	0.0666667	0.2	0.0941176	0.117647	0.211765	0.32	0.0711111	0.391111
108	0.166667	0.0833333	0.25	0	0.103704	0.103704	0.0313725	0.0705882	0.101961	0.0711111	0.0622222	0.133333
109	0.0333333	0.0333333	0.0666667	0.0148148	0.0962963	0.111111	0.0313725	0.0313725	0.0627451	0.0711111	0.0711111	0.142222
110	0	0.05	0.05	0.0740741	0.00740741	0.0814815	0.188235	0.321569	0.509804	0.0355556	0.0533333	0.0888889
111	0.0333333	0.0333333	0.0666667	0.0296296	0	0.0296296	0.0156863	0.0392157	0.054902	0.0533333	0.0622222	0.115556
112	0	0.05	0.05	0.0296296	0.103704	0.133333	0.0156863	0.0313725	0.0470588	0.0177778	0.0177778	0.0355556
113	0	0.05	0.05	0.103704	0.0592593	0.162963	0.0470588	0.109804	0.133333	0.0888889	0.0533333	0.142222
114	0	0	0	0.0740741	0.140741	0.214815	0.0156863	0.0470588	0.0627451	0.0355556	0.0622222	0.0977778
115	0.0333333	0	0.0333333	0.0444444	0.222222	0.266667	0.0470588	0.0313725	0.0784314	0.0177778	0.0977778	0.115556
116	0	0.116667	0.116667	0.0148148	0.266667	0.281481	0.0627451	0.101961	0.164706	0.0888889	0.115556	0.204444
117	0	0.0166667	0.0166667	0.0148148	0.177778	0.192593	0	0.101961	0.101961	0.0533333	0.0888889	0.142222
118	0.1	0.0666667	0.166667	0.0148148	0.207407	0.222222	0.0784314	0.0862745	0.164706	0.0355556	0.08	0.115556
119	0.133333	0.0833333	0.216667	0.103704	0.311111	0.414815	0.0470588	0.12549	0.172549	0.0177778	0.0355556	0.0533333
120	0	0.05	0.05	0.0740741	0.214815	0.288889	0.109804	0.0941176	0.203922	0.0533333	0.133333	0.186667
121	0	0	0	0.133333	0.111111	0.244444	0.0156863	0.0862745	0.101961	0	0.106667	0.106667
122	0	0	0	0.0592593	0.237037	0.296296	0.0784314	0.0392157	0.117647	0	0.195556	0.195556
123	0.0333333	0	0.0333333	0.0444444	0.22963	0.274074	0.0470588	0.0941176	0.141176	0.0355556	0.195556	0.231111
124	0	0.05	0.05	0.0444444	0.0222222	0.0666667	0.219608	0.172549	0.392157	0	0.0622222	0.0622222
